# Supplementary material for: Comparative Analysis for Genetic Characterization in Korean Native Jeju Horse
Source: MDPI journal article supplement (doi:10.3390/ani11071924), 2021-06-28
Supplement: s1 [file s1]

Supplementary Figure S1.

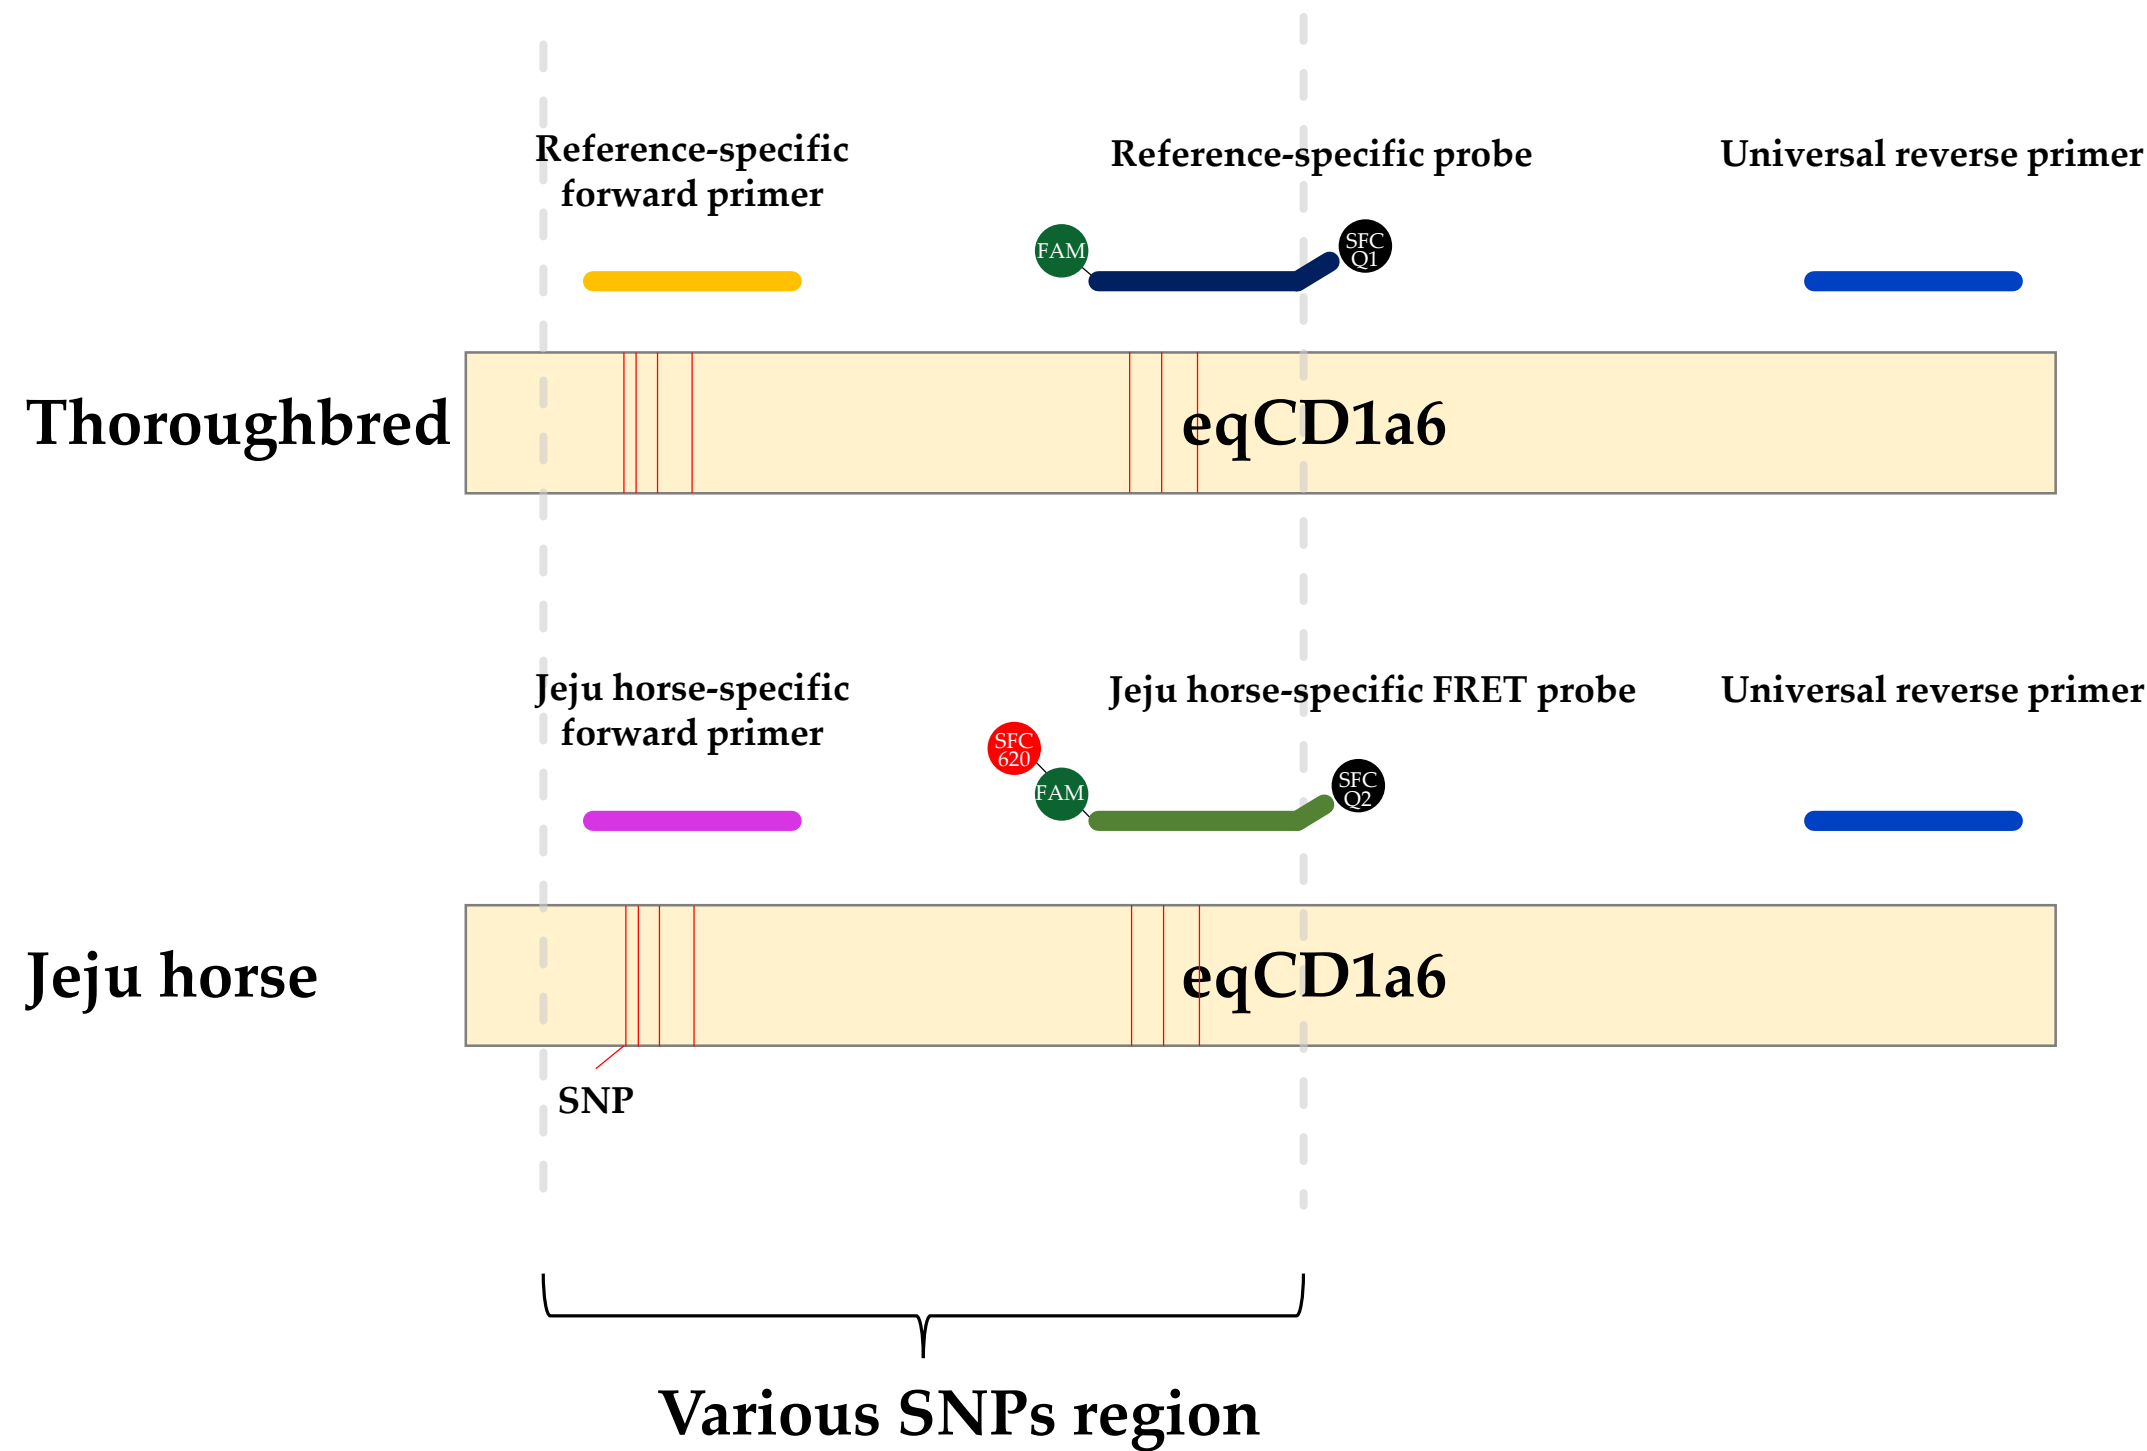

**RSF:** CAGTGAGGAGCTGACTGAAATCG

**JSF:** CAGCAATAAGGAGATGACTGAAATGG

**UR:** CAAGCTGCCATTGACTGGCAT

**JSP:** FAM/ATCCCGTATGACCTCCATTGGATTTAATCAGG/SFCQ1

**RSP:** SFC620/AGT/FAM/ATTCCGAACGTTTCAGCATTGAATTTAATCAGA/SFCQ2

RSF = Reference-specific forward primer  
JSF = Jeju horse-specific forward primer  
UR = Universal reverse primer  
JSP = Jeju horse-specific probe  
RSP = Reference-specific FRET probe
